# Supplementary material for: Separating the effects of nucleotide and EB binding on microtubule structure
Source: PubMed Central journal article supplement — Proc Natl Acad Sci U S A. 2018 Jun 18;115(27):E6191–200. doi: 10.1073/pnas.1802637115 (PMC6142192; doi:10.1073/pnas.1802637115), 2018-06-18
Supplement: pnas.1802637115.sapp.pdf [file pnas.1802637115.sapp.pdf]

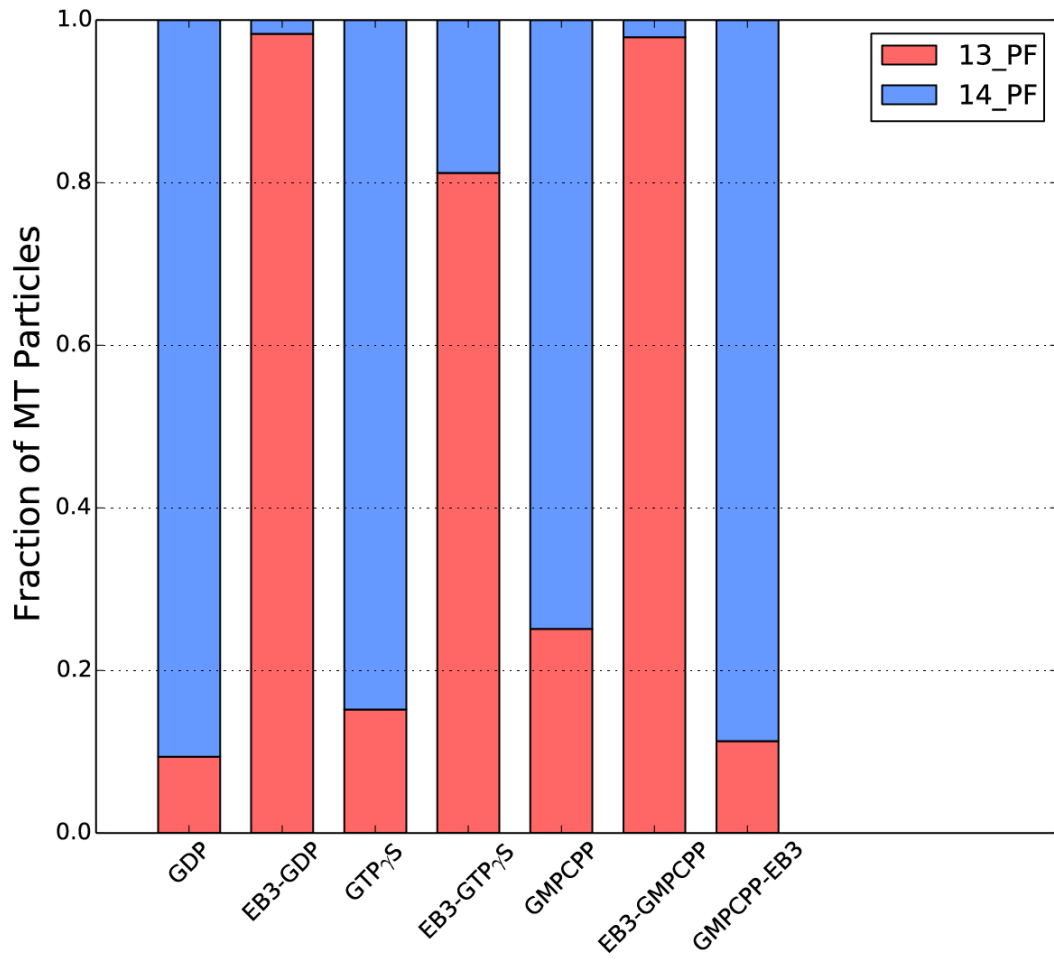

**Fig. S1:** Histogram of the PF distribution for MTs in different states.

**Table S1: Data collection and processing statistics.** The resolution number for each reconstruction was estimated by calculating the Fourier Shell Correlation (FSC) of one ‘protofilament’ containing 3 adjacent tubulin dimers from the odd and even maps, using a FSC 0.143 criterion. For the GMPCPP-EB3 state, the two resolution numbers are for the 14-PF MT and correspond to class 1 and 2, respectively. We did not pursue a reconstruction for the 13-PF MT due to the limited number of segments.

| Dataset / MT States                              | GMPCPP           | GDP              | GMPCPP-K         | GTP $\gamma$ S   | GMPCPP-EB3                | GMPCPP           |
|--------------------------------------------------|------------------|------------------|------------------|------------------|---------------------------|------------------|
| Location of Data collection                      | UCSF             | UCSF             | UCSF             | UCB              | UCB                       | WUSTL            |
| Microscope                                       | Titan Krios      | Titan Krios      | Titan Krios      | Titan (low base) | Titan (low base)          | Titan Krios      |
| calibrated pixel size                            | 1.079            | 1.079            | 1.079            | 1.330            | 1.330                     | 1.096            |
| # of frames                                      | 25               | 25               | 25               | 20               | 20                        | 40               |
| exposure time / frame                            | 0.2              | 0.2              | 0.2              | 0.3              | 0.3                       | 0.2              |
| Total exposure time (sec)                        | 5                | 5                | 5                | 6                | 6                         | 8                |
| Dose / frame                                     | 1.4              | 1.4              | 1.4              | 1.44             | 1.44                      | 1.33             |
| Total dose                                       | 35               | 35               | 35               | 28.8             | 28.8                      | 53.2             |
| K2 camera mode                                   | super-resolution | super-resolution | super-resolution | counting         | counting                  | counting         |
| Data collection software                         | SerialEM         | SerialEM         | SerialEM         | Leginon          | Leginon                   | EPU              |
| # of Micrographs used                            | 405              | 695              | 346              | 616              | 182                       | 1176             |
| # of Particles (13PF / 14PF)                     | 6,465 / 28,882   | 24,482 / 48,097  | 5,716 / 29,927   | 9,071 / 49,145   | 1,666 / 13,159            | 25,729 / 110,127 |
| Resolution of symmetrized maps (13PF / 14PF) (Å) | 3.97 / 3.62      | 3.54 / 3.30      | 3.82 / 3.50      | 4.05 / 3.49      | (NA / NA) / (4.32 / 4.13) | 3.43 / 3.11      |
| Resolution of C1 maps (13PF / 14PF) (Å)          | 4.86 / 4.34      | 4.12 / 3.90      | 4.94 / 4.06      | 5.61 / 4.21      | (NA / NA) / (7.05 / 4.89) | 4.08 / 3.57      |

**Table S2: Lattice parameters of MTs in different states.** The values of the inter-dimer and intra-dimer distances were calculated from the atomic models of each state, using the mean of the C $\alpha$  distances between  $\alpha$ - and  $\beta$ -tubulin for each pair of corresponding residues. The dimer rise and dimer twist were measured from the C1 reconstructions of MTs in different states using the *relion\_helix\_toolbox* program in RELION v2.1, which gave results consistent with those obtained with the *hsearch\_lorentz* program in the IHRSR package that we previously used. To assess the robustness of our measurements, we split the whole dataset for each microtubule sample into three, non-overlapping subsets. The three sets of helical parameters measured from the reconstruction of each subset are then used to calculate the mean value and standard deviation of the helical parameters. For each measurement of dimer rise and dimer twist, the standard deviation is less than 0.02.

| MT States                  | Intra-dimer Distance | Inter-dimer Distance | Dimer Rise | Dimer Twist |
|----------------------------|----------------------|----------------------|------------|-------------|
| GDP 13-PF                  | 41.44                | 40.30                | 81.76      | 0.08        |
| GDP 14-PF                  | 41.50                | 40.25                | 81.74      | -0.48       |
| GDP-K 13-PF                | 41.38                | 40.36                | 81.64      | 0.09        |
| GDP-K 14-PF                | 41.40                | 40.20                | 81.63      | -0.46       |
| EB3-GDP 13-PF              | 41.28                | 40.24                | 81.54      | -0.13       |
| EB3-GDP-K 13-PF            | 41.35                | 40.32                | 81.59      | -0.11       |
| GTP $\gamma$ S 13-PF       | 41.35                | 40.45                | 81.93      | -0.12       |
| GTP $\gamma$ S 14-PF       | 41.32                | 40.40                | 81.70      | -0.56       |
| EB3-GTP $\gamma$ S 13-PF   | 41.29                | 40.32                | 81.60      | -0.25       |
| EB3-GTP $\gamma$ S-K 13-PF | 41.31                | 40.51                | 81.96      | -0.27       |
| GMPCPP 13-PF               | 41.53                | 42.43                | 83.95      | 0.23        |
| GMPCPP 14-PF               | 41.56                | 42.45                | 83.96      | -0.33       |
| GMPCPP-K 13-PF             | 41.45                | 42.00                | 83.30      | 0.21        |
| GMPCPP-K 14-PF             | 41.42                | 41.94                | 83.29      | -0.32       |
| EB3-GMPCPP 13-PF           | 41.34                | 40.47                | 81.98      | -0.13       |
| GMPCPP-TPX2 13-PF          | 41.67                | 42.61                | 84.33      | 0.40        |
| GMPCPP-TPX2 14-PF          | 41.67                | 42.56                | 84.31      | -0.23       |
| GMPCPP-EB3 14-PF (class 1) | 41.41                | 40.70                | 82.25      | -0.69       |
| GMPCPP-EB3 14-PF (class 2) | 41.55                | 42.08                | 83.57      | -0.45       |
